# Supplementary material for: Variation Tendency of CVD Risk Factors in Blood According to Age and Relative Grip Strength among Different Populations Based on Bayesian Probabilistic Approach: A Cross-Sectional Study from Jiangsu Province’s Data of China Physical Fitness Surveillance
Source: Preprints.org preprint supplement (doi:10.20944/preprints202211.0227.v1), 2022-11-14
Supplement: Supplementary file 1 [file supplementary]

## Approval Form for Ethical Review of Research in Ningbo University

|                                                                                                                                                                                                                                                                                                                                                                                                                                                                                                                                                                                                                                                                                                                                                                                                                                                                                                                                                                                                                                                                                                                                                                                                             |                                               |
|-------------------------------------------------------------------------------------------------------------------------------------------------------------------------------------------------------------------------------------------------------------------------------------------------------------------------------------------------------------------------------------------------------------------------------------------------------------------------------------------------------------------------------------------------------------------------------------------------------------------------------------------------------------------------------------------------------------------------------------------------------------------------------------------------------------------------------------------------------------------------------------------------------------------------------------------------------------------------------------------------------------------------------------------------------------------------------------------------------------------------------------------------------------------------------------------------------------|-----------------------------------------------|
| <b>1. Number (To be completed by the Ethics Committee) : NO. 20211145</b>                                                                                                                                                                                                                                                                                                                                                                                                                                                                                                                                                                                                                                                                                                                                                                                                                                                                                                                                                                                                                                                                                                                                   |                                               |
| <b>2. Research Title: Variation Tendency of CVD Risk Factors in Blood According to Age and Relative Grip Strength among Different Populations Based on Bayesian Probabilistic Approach: A Cross-Sectional Study from Jiangsu Province's Data of China Physical Fitness Surveillance</b>                                                                                                                                                                                                                                                                                                                                                                                                                                                                                                                                                                                                                                                                                                                                                                                                                                                                                                                     |                                               |
| <b>3. Research Leader: SB Feng</b>                                                                                                                                                                                                                                                                                                                                                                                                                                                                                                                                                                                                                                                                                                                                                                                                                                                                                                                                                                                                                                                                                                                                                                          |                                               |
| <b>Name: SB Feng</b>                                                                                                                                                                                                                                                                                                                                                                                                                                                                                                                                                                                                                                                                                                                                                                                                                                                                                                                                                                                                                                                                                                                                                                                        | <b>Institution: Faculty of Sports Science</b> |
| <b>Tel: 15558232081</b>                                                                                                                                                                                                                                                                                                                                                                                                                                                                                                                                                                                                                                                                                                                                                                                                                                                                                                                                                                                                                                                                                                                                                                                     | <b>Email: 2211040006@nbu.edu.cn</b>           |
| <b>4. Research Program Overview</b><br>To analysis the variation tendency of CVD risk factors in blood according to age and relative grip strength among different populations through Bayesian probabilistic approach.                                                                                                                                                                                                                                                                                                                                                                                                                                                                                                                                                                                                                                                                                                                                                                                                                                                                                                                                                                                     |                                               |
| <b>5. Potential Ethical Issues and Measures to Address Them</b><br>All participants completed a standardized questionnaire to capture information on demographics, socioeconomic position, medical history, physical activity, and medication use. At the time of interview, anthropometry, blood pressure, and electrocardiographic measurements were obtained. Bodyweight and height were measured without shoes while wearing light clothes and the abdominal circumference was measured as the narrowest circumference between the lower rib margin and anterior superior iliac crest above the umbilicus at exhalation. Participants had their systolic blood pressure (SBP) and diastolic blood pressure (DBP) measured after 5 minutes of rest in a seated position with their arms, back, and feet supported. The first and fifth Korotkoff sounds were registered to indicate SBP and DBP, respectively. Two blood pressure measures were obtained, and the mean was calculated.<br><br>Blood samples were obtained from all participants through venipuncture. Serum concentrations of glucose, total cholesterol, HDL cholesterol, and triglycerides were determined using the enzymatic method. |                                               |
| <b>6. Research Leader Assurance</b><br>I declare that the contents filled out are true and I will conduct the research in strict accordance with the relevant contents of the approval form. I also declare that I will strictly abide by the national laws and relevant regulations, while protecting the health, rights and privacy of the research subjects.<br><div style="text-align: right;"><b>Signature:</b> <br/><b>Date:</b> 2021.11.14</div>                                                                                                                                                                                                                                                                                                                                                                                                                                                                                                                                                                                                                                                                |                                               |
| <b>The following content is filled in by the Ethics Committee</b>                                                                                                                                                                                                                                                                                                                                                                                                                                                                                                                                                                                                                                                                                                                                                                                                                                                                                                                                                                                                                                                                                                                                           |                                               |

### **7. Review Expert Opinion**

After review, the research value of the project is high, the research design is reasonable, the consideration of potential ethical issues is adequate, the treatment measures taken are effective and appropriate, and it meets the ethical requirements and is approved to carry out the research.

**Signature:** 

**Date:** 2021.11.14

### **8. Ethics Committee Opinion**

This committee has examined the scientific value and ethical issues of the research content and agreed to the implementation of the research.

**Committee Chairman (signature):** 

**Ethics Committee (official seal):** 2021.11.14
